# Supplementary material for: Porcine Deltacoronavirus (PDCoV) Entry into PK-15 Cells by Caveolae-Mediated Endocytosis
Source: MDPI journal article supplement (doi:10.3390/v14030496), 2022-02-28
Supplement: s1 [file s1]

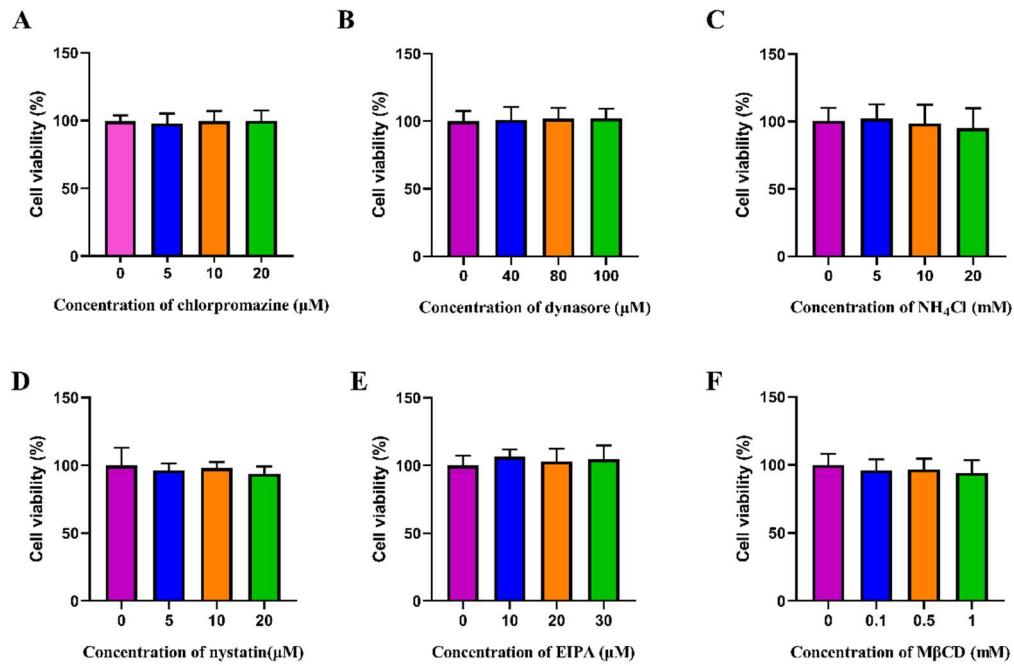

**Figure S1: Cell viabilities in response to inhibitor treatment.**

**Table S1. Sequence of shRNA used to lentivirus packaging**

| shRNA  | Target sequence (5'→3') |
|--------|-------------------------|
| shCLTC | ATGCGTATCAGTCCAGATCA    |
| shCAV1 | AGTGTATGACGCGCACACCA    |
| shDNM2 | G TTCAGGAATCGTCACTCGG   |

**Table S2. Primers used for real-time RT-PCR assay**

| Primer       | Nucleotide sequence (5'→3') |
|--------------|-----------------------------|
| Caveolin 1-F | GATCCCAAGCATCTCAACGA        |
| Caveolin 1-R | AGAGGGCAGACAGCAAACG         |
| dynamain2-F  | TCCCACTCGCAAGACCAAA         |
| dynamain2-R  | CTCAAAGGGAAACCGCTCA         |
| PDCoV-N-F    | CTATGAGCCACCCACCAA          |
| PDCoV-N-R    | TCCCACTCCCAATCCTGT          |
| β-actin-F    | CTTCCTGGGCATGGAGTCC         |
| β-actin-R    | GGCGCGATGATCTTGATCTTC       |
